# Supplementary material
Source: Elsevier journal article supplement (https://www.sciencedirect.com/science/article/pii/S0210569122002364)
Supplement: mmc2 [file S0210569122002364:mmc2.doc]

**Anexo 2:** Hospitales participantes

Hospitales públicos:

1. Hospital Central de la Defensa “Gómez Ulla”
2. Hospital Clínico San Carlos
3. Hospital El Escorial
4. Hospital General Universitario Gregorio Marañón
5. Hospital Universitario 12 de Octubre
6. Hospital Universitario de Fuenlabrada
7. Hospital Universitario de Getafe
8. Hospital Universitario de la Princesa
9. Hospital Universitario de Móstoles
10. Hospital Universitario de Torrejón
11. Hospital Universitario del Henares
12. Hospital Universitario del Sureste
13. Hospital Universitario del Tajo
14. Hospital Universitario Fundación Alcorcón
15. Hospital Universitario Fundación Jiménez Díaz
16. Hospital Universitario Infanta Cristina
17. Hospital Universitario Infanta Leonor
18. Hospital Universitario Infanta Sofía
19. Hospital Universitario La Paz
20. Hospital Universitario Príncipe de Asturias
21. Hospital Universitario Puerta de Hierro Majadahonda
22. Hospital Universitario Ramón y Cajal
23. Hospital Universitario Rey Juan Carlos
24. Hospital Universitario Severo Ochoa

Hospitales privados:

1. Clínica Universidad de Navarra sede de Madrid
2. Hospital HM Montepríncipe
3. Hospital HM Puerta del Sur
4. Hospital MD Anderson Cancer Center Madrid
5. Hospital Ruber Internacional
6. Hospital Sanitas La Moraleja
7. Hospital Sanitas La Zarzuela
8. Hospital Quironsalud Sur
9. Hospital Universitario Quironsalud Madrid
10. Hospital Universitario San Francisco de Asís
11. Hospital Viamed Fuensanta
12. Hospital Vithas Madrid Arturo Soria
13. Hospital Vithas Madrid La Milagrosa
